# Supplementary material for: The Ameliorative Effect and Mechanisms of Ruditapes philippinarum Bioactive Peptides on Obesity and Hyperlipidemia Induced by a High-Fat Diet in Mice
Source: MDPI journal article supplement (doi:10.3390/nu14235066), 2022-11-28
Supplement: s1 [file s1]

**Supplementary Table S1.** Contents of main components of RBPs

|      | Crude protein content (%) | Total sugar (%) | Inorganic salt (%) | Moisture content (%) |
|------|---------------------------|-----------------|--------------------|----------------------|
| RBPs | 71.10 ± 1.25              | 19.90 ± 0.58    | 4.02 ± 0.89        | 5.00 ± 0.94          |

All the data presented are the mean ± standard deviation (SD).

**Supplementary Table S2.** Formulation of high fat feed

| Component     | Composition ratio of high fat feed (g/100g) |
|---------------|---------------------------------------------|
| Corn starch   | 50.00                                       |
| Lard          | 16.90                                       |
| Sucrose       | 15.00                                       |
| Casein        | 10.8                                        |
| Cholesterol   | 1.3                                         |
| Cholate       | 0.3                                         |
| Mixed vitamin | 2.0                                         |
| Maltodextrin  | 3.7                                         |
| Total         | 100                                         |

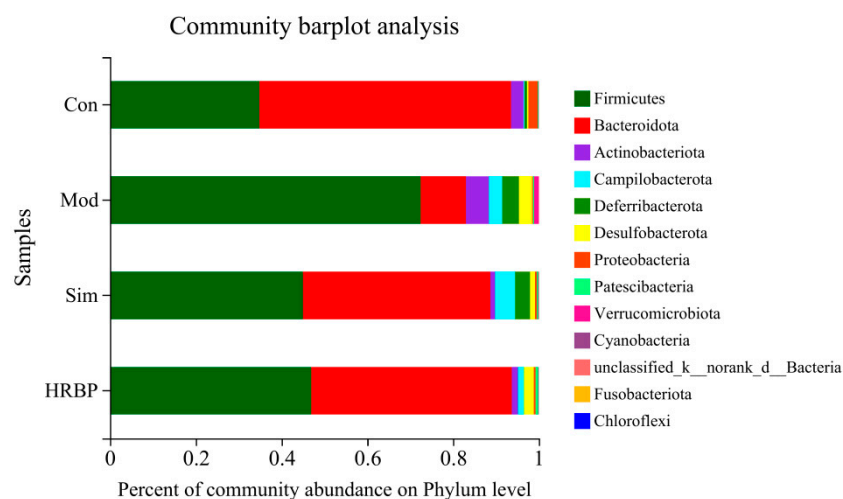

**Supplementary Figure S1.** Composition of gut microflora at the Phylum level. With the vertical coordinate as the group name, the horizontal coordinate as the proportion of the species in the sample, the columns of different colors represent different species and the length of the columns represents the proportion of the species.
